# Supplementary material for: Archival bone marrow smears are useful in targeted next-generation sequencing for diagnosing myeloid neoplasms
Source: PubMed Central journal article supplement (PMC8301613; doi:10.1371/journal.pone.0255257), 2021-07-23
Supplement: pone.0255257.s006.pdf [file pone.0255257.s006.pdf]

Raw image of S3B Fig

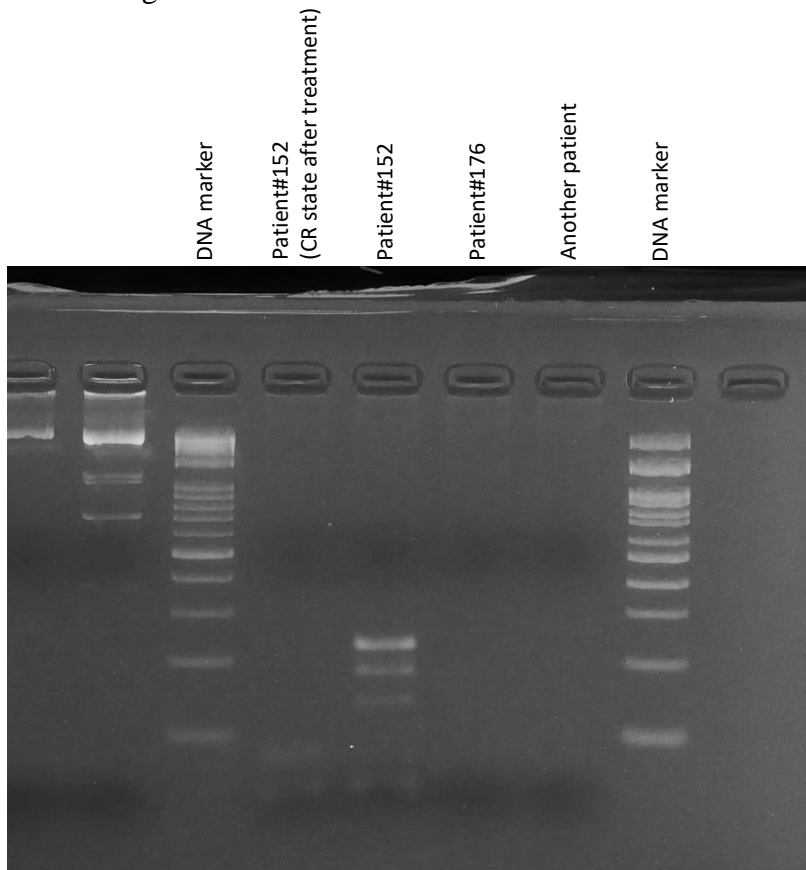

Used in S3 Fig

Raw image of S4B Fig

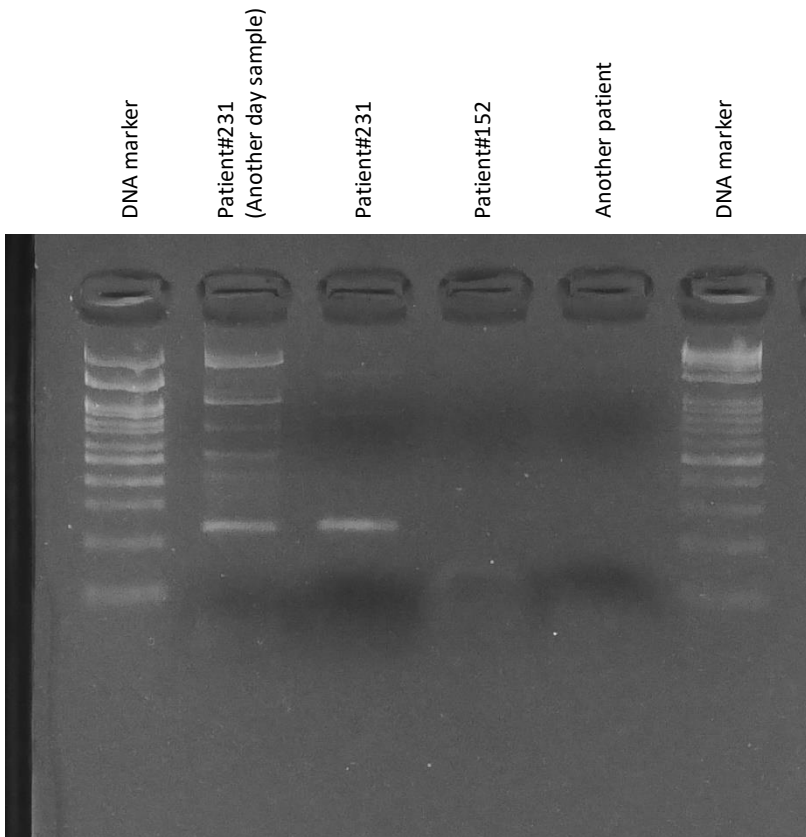

Used in S4 Fig
